# Supplementary material for: Complement receptor CD35 on single urinary extracellular vesicle as novel biomarker of sepsis-associated acute kidney injury
Source: Research Square preprint supplement (doi:10.21203/rs.3.rs-5124447/v1), 2024-12-09
Supplement: Supplementary file 1 [file ca7b019e78341ed55c439e5d.docx]

**Supplementary Table 1. Baseline Characteristics of the Population Included in the Proximity Barcoding Assay**

| **Baseline characteristics** | **Non_AKI (n=8)** | **AKI (n=8)** | **p-value** |
| --- | --- | --- | --- |
| **Age （year）** | 66.50 ± 8.78 | 63.88 ± 15.09 | 0.494 |
| **Weight (kg)** | 62.25 ± 12.59 | 68.38 ± 10.62 | 0.246 |
| **Height (cm)** | 165.25 ± 7.59 | 168.50 ± 6.02 | 0.364 |
| **Baseline_Scr (umol/L)** | 56.47 ± 14.62 | 87.50 ± 28.47 | 0.028 |
| **Max_Scr (umol/L)** | 56.17 ± 11.28 | 206.50 ± 68.10 | <0.001 |
| **Gender (%)** |  |  | 1 |
| Male | 5 (62.50%) | 5 (62.50%) |  |
| Female | 3 (37.50%) | 3 (37.50%) |  |
| **Hypertension (%)** |  |  | 1 |
| No | 4 (50.00%) | 4 (50.00%) |  |
| Yes | 4 (50.00%) | 4 (50.00%) |  |
| **Cardiovascular diseases (%)** |  |  | 0.2 |
| No | 8 (100.00%) | 5 (62.50%) |  |
| Yes | 0 (0.00%) | 3 (37.50%) |  |
| **Anemia (%)** |  |  | 0.315 |
| No | 5 (62.50%) | 2 (25.00%) |  |
| Yes | 3 (37.50%) | 6 (75.00%) |  |

AKI: Acute kidney injury; Baseline_Scr: baseline_maximum serum; Max_Scr: maximum serum creatinine after admission.
